# Supplementary material for: Comprehensive validation of fasting-based and oral glucose tolerance test–based indices of insulin secretion against gold standard measures
Source: PubMed Central journal article supplement (PMC9472162; doi:10.1136/bmjdrc-2022-002909), 2022-09-13
Supplement: bmjdrc-2022-002909supp001.pdf [file bmjdrc-2022-002909supp001.pdf]

## Supplementary Material

**Supplementary Table 1: Correlation between fasting and OGTT-derived insulin secretion indices and first-phase insulin secretion measured with the IVGTT. (\* p<0.05; \*\*p<0.01; \*\*\*p<0.001)**

| Fasting/OGTT-based indices                           | IVGTT-derived measurements                  |                                            |                                               |                                              |                                             |                                            |                                               |                                              |                                             |                                            |                                               |                                              |
|------------------------------------------------------|---------------------------------------------|--------------------------------------------|-----------------------------------------------|----------------------------------------------|---------------------------------------------|--------------------------------------------|-----------------------------------------------|----------------------------------------------|---------------------------------------------|--------------------------------------------|-----------------------------------------------|----------------------------------------------|
|                                                      | NGT                                         |                                            | NGT                                           |                                              | IFG/IGT                                     |                                            | IFG/IGT                                       |                                              | T2D                                         |                                            | T2D                                           |                                              |
|                                                      | Insulin<br>iAUC <sub>0-10</sub><br>Spearman | Insulin<br>iAUC <sub>0-10</sub><br>Pearson | C-peptide<br>iAUC <sub>0-10</sub><br>Spearman | C-peptide<br>iAUC <sub>0-10</sub><br>Pearson | Insulin<br>iAUC <sub>0-10</sub><br>Spearman | Insulin<br>iAUC <sub>0-10</sub><br>Pearson | C-peptide<br>iAUC <sub>0-10</sub><br>Spearman | C-peptide<br>iAUC <sub>0-10</sub><br>Pearson | Insulin<br>iAUC <sub>0-10</sub><br>Spearman | Insulin<br>iAUC <sub>0-10</sub><br>Pearson | C-peptide<br>iAUC <sub>0-10</sub><br>Spearman | C-peptide<br>iAUC <sub>0-10</sub><br>Pearson |
| AUC (CP <sub>0-120</sub> )/AUC (G <sub>0-120</sub> ) | 0.428***                                    | 0.392***                                   | 0.475***                                      | 0.445***                                     | 0.573***                                    | 0.501***                                   | 0.551***                                      | 0.513***                                     | 0.296                                       | 0.22                                       | 0.136                                         | 0.222                                        |
| AUC(CP <sub>0-30</sub> )/AUC(G <sub>0-30</sub> )     | 0.546***                                    | 0.556***                                   | 0.572***                                      | 0.58***                                      | 0.597***                                    | 0.555***                                   | 0.56***                                       | 0.544***                                     | 0.165                                       | 0.049                                      | 0.033                                         | 0.063                                        |
| AUC (CP <sub>0-60</sub> )/AUC (G <sub>0-60</sub> )   | 0.403***                                    | 0.364***                                   | 0.443***                                      | 0.407***                                     | 0.591***                                    | 0.563***                                   | 0.564***                                      | 0.56***                                      | 0.236                                       | 0.172                                      | 0.046                                         | 0.144                                        |
| AUC(CP <sub>all</sub> )                              | 0.311***                                    | 0.297***                                   | 0.296***                                      | 0.3***                                       | 0.453***                                    | 0.426***                                   | 0.42***                                       | 0.407***                                     | 0.186                                       | 0.071                                      | 0.021                                         | 0.035                                        |
| AUC(I <sub>all</sub> )                               | 0.435***                                    | 0.439***                                   | 0.355***                                      | 0.373***                                     | 0.48***                                     | 0.355***                                   | 0.367***                                      | 0.252*                                       | 0.243                                       | 0.209                                      | 0.125                                         | 0.227                                        |
| AUC(I <sub>0-120</sub> )/AUC(G <sub>0-120</sub> )    | 0.525***                                    | 0.534***                                   | 0.462***                                      | 0.48***                                      | 0.555***                                    | 0.405***                                   | 0.45***                                       | 0.31**                                       | 0.443                                       | 0.339                                      | 0.321                                         | 0.373                                        |
| AUC(I <sub>0-30</sub> )/AUC(G <sub>0-30</sub> )      | 0.635***                                    | 0.665***                                   | 0.576***                                      | 0.604***                                     | 0.634***                                    | 0.513***                                   | 0.537***                                      | 0.424***                                     | 0.468                                       | 0.409                                      | 0.368                                         | 0.346                                        |
| AUC(I <sub>0-60</sub> )/AUC(G <sub>0-60</sub> )      | 0.423***                                    | 0.399***                                   | 0.367***                                      | 0.379***                                     | 0.542***                                    | 0.465***                                   | 0.426***                                      | 0.378***                                     | 0.35                                        | 0.213                                      | 0.204                                         | 0.243                                        |
| BIGTT-AIR <sub>0-30-120</sub>                        | 0.651***                                    | 0.697***                                   | 0.596***                                      | 0.619***                                     | 0.483***                                    | 0.411***                                   | 0.365***                                      | 0.295**                                      | 0.382                                       | 0.411                                      | 0.593*                                        | 0.525*                                       |
| BIGTT-AIR <sub>0-60-120</sub>                        | 0.531***                                    | 0.54***                                    | 0.5***                                        | 0.534***                                     | 0.468***                                    | 0.51***                                    | 0.347***                                      | 0.424***                                     | 0.175                                       | 0.173                                      | 0.396                                         | 0.306                                        |
| CIR <sub>120</sub>                                   | 0.259***                                    | 0.129                                      | 0.255***                                      | 0.155*                                       | 0.459***                                    | 0.17                                       | 0.433***                                      | 0.198                                        | 0.582*                                      | 0.293                                      | 0.521*                                        | 0.381                                        |
| CIR <sub>30</sub>                                    | 0.646***                                    | 0.616***                                   | 0.642***                                      | 0.616***                                     | 0.565***                                    | 0.452***                                   | 0.496***                                      | 0.416***                                     | 0.668**                                     | 0.607*                                     | 0.579*                                        | 0.573*                                       |
| CIR <sub>60</sub>                                    | 0.43***                                     | 0.288***                                   | 0.447***                                      | 0.341***                                     | 0.598***                                    | 0.396***                                   | 0.518***                                      | 0.382***                                     | 0.493                                       | 0.33                                       | 0.354                                         | 0.346                                        |
| CP <sub>120</sub> /CP <sub>0</sub>                   | -0.109                                      | -0.13                                      | -0.105                                        | -0.118                                       | -0.128                                      | -0.169                                     | -0.079                                        | -0.11                                        | 0.196                                       | 0.436                                      | 0.218                                         | 0.411                                        |
| CP <sub>30</sub> /CP <sub>0</sub>                    | 0.264***                                    | 0.201**                                    | 0.301***                                      | 0.241***                                     | 0.321**                                     | 0.274**                                    | 0.366***                                      | 0.303**                                      | 0.684**                                     | 0.807***                                   | 0.556*                                        | 0.642*                                       |
| CP <sub>60</sub> /CP <sub>0</sub>                    | -0.048                                      | -0.092                                     | -0.02                                         | -0.07                                        | 0.112                                       | 0.102                                      | 0.183                                         | 0.156                                        | 0.529*                                      | 0.716**                                    | 0.264                                         | 0.49                                         |
| CP <sub>0</sub>                                      | 0.31***                                     | 0.342***                                   | 0.278***                                      | 0.323***                                     | 0.331**                                     | 0.345***                                   | 0.272**                                       | 0.294**                                      | -0.129                                      | -0.251                                     | -0.182                                        | -0.214                                       |

| Fasting/OGTT-based indices          | IVGTT-derived measurements                  |                                            |                                               |                                              |                                             |                                            |                                               |                                              |                                             |                                            |                                               |                                              |
|-------------------------------------|---------------------------------------------|--------------------------------------------|-----------------------------------------------|----------------------------------------------|---------------------------------------------|--------------------------------------------|-----------------------------------------------|----------------------------------------------|---------------------------------------------|--------------------------------------------|-----------------------------------------------|----------------------------------------------|
|                                     | NGT                                         |                                            | NGT                                           |                                              | IFG/IGT                                     |                                            | IFG/IGT                                       |                                              | T2D                                         |                                            | T2D                                           |                                              |
|                                     | Insulin<br>iAUC <sub>0-10</sub><br>Spearman | Insulin<br>iAUC <sub>0-10</sub><br>Pearson | C-peptide<br>iAUC <sub>0-10</sub><br>Spearman | C-peptide<br>iAUC <sub>0-10</sub><br>Pearson | Insulin<br>iAUC <sub>0-10</sub><br>Spearman | Insulin<br>iAUC <sub>0-10</sub><br>Pearson | C-peptide<br>iAUC <sub>0-10</sub><br>Spearman | C-peptide<br>iAUC <sub>0-10</sub><br>Pearson | Insulin<br>iAUC <sub>0-10</sub><br>Spearman | Insulin<br>iAUC <sub>0-10</sub><br>Pearson | C-peptide<br>iAUC <sub>0-10</sub><br>Spearman | C-peptide<br>iAUC <sub>0-10</sub><br>Pearson |
| CP <sub>0</sub> /G <sub>0</sub>     | 0.314***                                    | 0.355***                                   | 0.294***                                      | 0.344***                                     | 0.356***                                    | 0.367***                                   | 0.293**                                       | 0.319**                                      | -0.007                                      | -0.12                                      | -0.054                                        | -0.018                                       |
| CP <sub>120</sub>                   | 0.183**                                     | 0.156*                                     | 0.164*                                        | 0.152*                                       | 0.277**                                     | 0.213*                                     | 0.249*                                        | 0.206                                        | 0.029                                       | 0.044                                      | -0.032                                        | 0.059                                        |
| CP <sub>120</sub> /G <sub>120</sub> | 0.203**                                     | 0.179**                                    | 0.225**                                       | 0.21**                                       | 0.452***                                    | 0.312**                                    | 0.423***                                      | 0.326**                                      | 0.214                                       | 0.194                                      | 0.204                                         | 0.26                                         |
| CP <sub>30</sub>                    | 0.52***                                     | 0.484***                                   | 0.523***                                      | 0.496***                                     | 0.614***                                    | 0.578***                                   | 0.575***                                      | 0.56***                                      | 0.059                                       | 0.063                                      | -0.147                                        | -0.039                                       |
| CP <sub>30</sub> /G <sub>30</sub>   | 0.57***                                     | 0.555***                                   | 0.609***                                      | 0.593***                                     | 0.629***                                    | 0.566***                                   | 0.613***                                      | 0.576***                                     | 0.314                                       | 0.189                                      | 0.138                                         | 0.146                                        |
| CP <sub>60</sub>                    | 0.291***                                    | 0.26***                                    | 0.273***                                      | 0.264***                                     | 0.485***                                    | 0.513***                                   | 0.466***                                      | 0.503***                                     | 0.236                                       | 0.103                                      | 0.001                                         | 0.009                                        |
| CP <sub>60</sub> /G <sub>60</sub>   | 0.402***                                    | 0.334***                                   | 0.47***                                       | 0.401***                                     | 0.604***                                    | 0.561***                                   | 0.593***                                      | 0.578***                                     | 0.357                                       | 0.258                                      | 0.132                                         | 0.185                                        |
| HOMA-%B                             | 0.439***                                    | 0.483***                                   | 0.357***                                      | 0.417***                                     | 0.452***                                    | 0.421***                                   | 0.309**                                       | 0.308**                                      | -0.139                                      | -0.193                                     | 0.029                                         | 0.088                                        |
| HOMA2-%B(CP)                        | 0.286***                                    | 0.313***                                   | 0.284***                                      | 0.32***                                      | 0.382***                                    | 0.369***                                   | 0.323**                                       | 0.333**                                      | 0.107                                       | 0.057                                      | 0.186                                         | 0.228                                        |
| HOMA2-%B(I)                         | 0.401***                                    | 0.475***                                   | 0.333***                                      | 0.404***                                     | 0.421***                                    | 0.419***                                   | 0.282**                                       | 0.308**                                      | -0.077                                      | -0.144                                     | 0.218                                         | 0.211                                        |
| I <sub>0</sub>                      | 0.456***                                    | 0.499***                                   | 0.356***                                      | 0.402***                                     | 0.418***                                    | 0.427***                                   | 0.296**                                       | 0.326**                                      | -0.368                                      | -0.47                                      | -0.286                                        | -0.319                                       |
| I <sub>0</sub> /G <sub>0</sub>      | 0.468***                                    | 0.517***                                   | 0.375***                                      | 0.425***                                     | 0.438***                                    | 0.446***                                   | 0.308**                                       | 0.343***                                     | -0.307                                      | -0.372                                     | -0.154                                        | -0.151                                       |
| I <sub>120</sub>                    | 0.322***                                    | 0.297***                                   | 0.254***                                      | 0.228***                                     | 0.289**                                     | 0.232*                                     | 0.206                                         | 0.134                                        | 0.075                                       | 0.191                                      | 0.036                                         | 0.226                                        |
| I <sub>120</sub> /G <sub>120</sub>  | 0.352***                                    | 0.339***                                   | 0.296***                                      | 0.28***                                      | 0.385***                                    | 0.272**                                    | 0.308**                                       | 0.19                                         | 0.325                                       | 0.287                                      | 0.282                                         | 0.345                                        |
| I <sub>30</sub>                     | 0.586***                                    | 0.582***                                   | 0.519***                                      | 0.524***                                     | 0.63***                                     | 0.49***                                    | 0.535***                                      | 0.401***                                     | 0.404                                       | 0.358                                      | 0.239                                         | 0.208                                        |
| ΔI <sub>30</sub>                    | 0.579***                                    | 0.567***                                   | 0.517***                                      | 0.515***                                     | 0.63***                                     | 0.478***                                   | 0.539***                                      | 0.397***                                     | 0.493                                       | 0.464                                      | 0.279                                         | 0.279                                        |
| I <sub>30</sub> /G <sub>30</sub>    | 0.645***                                    | 0.682***                                   | 0.594***                                      | 0.627***                                     | 0.634***                                    | 0.513***                                   | 0.548***                                      | 0.435***                                     | 0.546*                                      | 0.511                                      | 0.357                                         | 0.399                                        |
| I <sub>60</sub>                     | 0.326***                                    | 0.316***                                   | 0.255***                                      | 0.288***                                     | 0.468***                                    | 0.423***                                   | 0.372***                                      | 0.355***                                     | 0.268                                       | 0.148                                      | 0.107                                         | 0.132                                        |
| ΔI <sub>60</sub>                    | 0.3***                                      | 0.288***                                   | 0.235***                                      | 0.267***                                     | 0.46***                                     | 0.413***                                   | 0.373***                                      | 0.349***                                     | 0.332                                       | 0.209                                      | 0.132                                         | 0.173                                        |
| I <sub>60</sub> /G <sub>60</sub>    | 0.434***                                    | 0.401***                                   | 0.395***                                      | 0.393***                                     | 0.562***                                    | 0.473***                                   | 0.458***                                      | 0.394***                                     | 0.389                                       | 0.266                                      | 0.196                                         | 0.267                                        |
| IGI <sub>120</sub>                  | 0.222**                                     | 0.136                                      | 0.164*                                        | 0.109                                        | 0.43***                                     | 0.205                                      | 0.363**                                       | 0.162                                        | 0.196                                       | 0.164                                      | 0.174                                         | 0.206                                        |
| IGI <sub>30</sub>                   | 0.665***                                    | 0.583***                                   | 0.655***                                      | 0.594***                                     | 0.606***                                    | 0.495***                                   | 0.528***                                      | 0.445***                                     | 0.682**                                     | 0.608*                                     | 0.432                                         | 0.428                                        |
| IGI <sub>60</sub>                   | 0.406***                                    | 0.184**                                    | 0.423***                                      | 0.246***                                     | 0.544***                                    | 0.271**                                    | 0.445***                                      | 0.266*                                       | 0.454                                       | 0.296                                      | 0.196                                         | 0.252                                        |
| I <sub>120</sub> /I <sub>0</sub>    | -0.071                                      | -0.033                                     | -0.065                                        | -0.022                                       | -0.068                                      | -0.097                                     | -0.057                                        | -0.075                                       | 0.379                                       | 0.601*                                     | 0.336                                         | 0.521*                                       |

| Fasting/OGTT-based indices      | IVGTT-derived measurements                  |                                            |                                               |                                              |                                             |                                            |                                               |                                              |                                             |                                            |                                               |                                              |
|---------------------------------|---------------------------------------------|--------------------------------------------|-----------------------------------------------|----------------------------------------------|---------------------------------------------|--------------------------------------------|-----------------------------------------------|----------------------------------------------|---------------------------------------------|--------------------------------------------|-----------------------------------------------|----------------------------------------------|
|                                 | NGT                                         |                                            | NGT                                           |                                              | IFG/IGT                                     |                                            | IFG/IGT                                       |                                              | T2D                                         |                                            | T2D                                           |                                              |
|                                 | Insulin<br>iAUC <sub>0-10</sub><br>Spearman | Insulin<br>iAUC <sub>0-10</sub><br>Pearson | C-peptide<br>iAUC <sub>0-10</sub><br>Spearman | C-peptide<br>iAUC <sub>0-10</sub><br>Pearson | Insulin<br>iAUC <sub>0-10</sub><br>Spearman | Insulin<br>iAUC <sub>0-10</sub><br>Pearson | C-peptide<br>iAUC <sub>0-10</sub><br>Spearman | C-peptide<br>iAUC <sub>0-10</sub><br>Pearson | Insulin<br>iAUC <sub>0-10</sub><br>Spearman | Insulin<br>iAUC <sub>0-10</sub><br>Pearson | C-peptide<br>iAUC <sub>0-10</sub><br>Spearman | C-peptide<br>iAUC <sub>0-10</sub><br>Pearson |
| I <sub>30</sub> /I <sub>0</sub> | 0.255***                                    | 0.193**                                    | 0.272***                                      | 0.242***                                     | 0.248*                                      | 0.164                                      | 0.284**                                       | 0.188                                        | 0.611*                                      | 0.642**                                    | 0.382                                         | 0.376                                        |
| I <sub>60</sub> /I <sub>0</sub> | -0.078                                      | -0.109                                     | -0.053                                        | -0.066                                       | 0.111                                       | 0.096                                      | 0.125                                         | 0.125                                        | 0.843***                                    | 0.662**                                    | 0.425                                         | 0.381                                        |
| Kadowaki model                  | 0.635***                                    | 0.662***                                   | 0.588***                                      | 0.613***                                     | 0.629***                                    | 0.501***                                   | 0.548***                                      | 0.433***                                     | 0.689**                                     | 0.609*                                     | 0.489                                         | 0.453                                        |
| log(I <sub>0</sub> )            | 0.456***                                    | 0.491***                                   | 0.356***                                      | 0.398***                                     | 0.431***                                    | 0.436***                                   | 0.298**                                       | 0.333**                                      | -0.368                                      | -0.424                                     | -0.286                                        | -0.252                                       |
| log(I <sub>120</sub> )          | 0.322***                                    | 0.325***                                   | 0.254***                                      | 0.257***                                     | 0.287**                                     | 0.207*                                     | 0.206                                         | 0.153                                        | 0.075                                       | 0.133                                      | 0.036                                         | 0.187                                        |
| log(I <sub>30</sub> )           | 0.586***                                    | 0.572***                                   | 0.519***                                      | 0.523***                                     | 0.63***                                     | 0.56***                                    | 0.535***                                      | 0.493***                                     | 0.404                                       | 0.357                                      | 0.239                                         | 0.219                                        |
| log(I <sub>60</sub> )           | 0.326***                                    | 0.305***                                   | 0.255***                                      | 0.267***                                     | 0.479***                                    | 0.435***                                   | 0.371***                                      | 0.368***                                     | 0.268                                       | 0.13                                       | 0.107                                         | 0.13                                         |
| log(I <sub>90</sub> )           | 0.204**                                     | 0.209**                                    | 0.133                                         | 0.132                                        | 0.307**                                     | 0.238*                                     | 0.184                                         | 0.153                                        | 0.264                                       | 0.091                                      | 0.204                                         | 0.222                                        |
| CPI <sub>0</sub>                | 0.314***                                    | 0.355***                                   | 0.294***                                      | 0.344***                                     | 0.356***                                    | 0.367***                                   | 0.293**                                       | 0.319**                                      | -0.007                                      | -0.12                                      | -0.054                                        | -0.018                                       |
| CPI <sub>120</sub>              | 0.203**                                     | 0.179**                                    | 0.225**                                       | 0.21**                                       | 0.452***                                    | 0.312**                                    | 0.423***                                      | 0.326**                                      | 0.214                                       | 0.194                                      | 0.204                                         | 0.26                                         |
| first-phase Stumvoll            | 0.658***                                    | 0.686***                                   | 0.615***                                      | 0.631***                                     | 0.591***                                    | 0.495***                                   | 0.498***                                      | 0.406***                                     | 0.461                                       | 0.43                                       | 0.511                                         | 0.473                                        |
| second-phase Stumvoll           | 0.561***                                    | 0.574***                                   | 0.479***                                      | 0.504***                                     | 0.608***                                    | 0.494***                                   | 0.497***                                      | 0.392***                                     | 0.179                                       | 0.056                                      | 0.082                                         | -0.028                                       |

**Supplementary Table 2: Correlation between fasting and OGTT-derived insulin secretion indices and first/second-phase insulin secretion measured with the hyperglycaemic clamp. (\* p<0.05; \*\*p<0.01; \*\*\*p<0.001)**

| Fasting/OGTT-based indices                           | Hyperglycaemic clamp – derived measurements |                               |                                  |                                 |                               |                              |                                 |                                |                                    |                                   |                                      |                                     |                                   |                                  |                                     |                                    |
|------------------------------------------------------|---------------------------------------------|-------------------------------|----------------------------------|---------------------------------|-------------------------------|------------------------------|---------------------------------|--------------------------------|------------------------------------|-----------------------------------|--------------------------------------|-------------------------------------|-----------------------------------|----------------------------------|-------------------------------------|------------------------------------|
|                                                      | NGT Insulin 1st-phase Spearman              | NGT Insulin 1st-phase Pearson | NGT C-peptide 1st-phase Spearman | NGT C-peptide 1st-phase Pearson | NGT Insulin 2d-phase Spearman | NGT Insulin 2d-phase Pearson | NGT C-peptide 2d-phase Spearman | NGT C-peptide 2d-phase Pearson | IFG/IGT Insulin 1st-phase Spearman | IFG/IGT Insulin 1st-phase Pearson | IFG/IGT C-peptide 1st-phase Spearman | IFG/IGT C-peptide 1st-phase Pearson | IFG/IGT Insulin 2d-phase Spearman | IFG/IGT Insulin 2d-phase Pearson | IFG/IGT C-peptide 2d-phase Spearman | IFG/IGT C-peptide 2d-phase Pearson |
| AUC (CP <sub>0-120</sub> )/AUC (G <sub>0-120</sub> ) | 0.508***                                    | 0.694***                      | 0.542***                         | 0.566***                        | 0.585***                      | 0.505***                     | 0.578***                        | 0.59***                        | 0.605**                            | 0.589**                           | 0.659***                             | 0.655***                            | 0.457*                            | 0.61**                           | 0.527*                              | 0.618**                            |
| AUC(CP <sub>0-30</sub> )/AUC(G <sub>0-30</sub> )     | 0.49***                                     | 0.733***                      | 0.524***                         | 0.655***                        | 0.518***                      | 0.557***                     | 0.5***                          | 0.624***                       | 0.768***                           | 0.788***                          | 0.757***                             | 0.833***                            | 0.64**                            | 0.802***                         | 0.617**                             | 0.756***                           |
| AUC (CP <sub>0-60</sub> )/AUC (G <sub>0-60</sub> )   | 0.579***                                    | 0.711***                      | 0.612***                         | 0.611***                        | 0.593***                      | 0.564***                     | 0.61***                         | 0.619***                       | 0.63**                             | 0.696***                          | 0.633**                              | 0.729***                            | 0.502*                            | 0.695***                         | 0.486*                              | 0.646**                            |
| AUC(CP <sub>all</sub> )                              | 0.45**                                      | 0.63***                       | 0.519***                         | 0.566***                        | 0.648***                      | 0.566***                     | 0.664***                        | 0.643***                       | 0.657**                            | 0.477*                            | 0.646**                              | 0.575**                             | 0.527*                            | 0.505*                           | 0.45*                               | 0.579**                            |
| AUC(I <sub>all</sub> )                               | 0.593***                                    | 0.728***                      | 0.52***                          | 0.788***                        | 0.746***                      | 0.837***                     | 0.605***                        | 0.751***                       | 0.582**                            | 0.51*                             | 0.517*                               | 0.611**                             | 0.549**                           | 0.599**                          | 0.397                               | 0.693***                           |
| AUC(I <sub>0-120</sub> )/AUC(G <sub>0-120</sub> )    | 0.65***                                     | 0.857***                      | 0.577***                         | 0.852***                        | 0.785***                      | 0.887***                     | 0.646***                        | 0.809***                       | 0.657***                           | 0.619**                           | 0.596**                              | 0.704***                            | 0.598**                           | 0.699***                         | 0.511*                              | 0.755***                           |
| AUC(I <sub>0-30</sub> )/AUC(G <sub>0-30</sub> )      | 0.764***                                    | 0.913***                      | 0.666***                         | 0.896***                        | 0.748***                      | 0.902***                     | 0.593***                        | 0.766***                       | 0.704***                           | 0.825***                          | 0.639**                              | 0.852***                            | 0.624**                           | 0.855***                         | 0.611**                             | 0.838***                           |
| AUC(I <sub>0-60</sub> )/AUC(G <sub>0-60</sub> )      | 0.596***                                    | 0.665***                      | 0.509***                         | 0.733***                        | 0.711***                      | 0.779***                     | 0.579***                        | 0.678***                       | 0.649**                            | 0.67***                           | 0.583**                              | 0.735***                            | 0.628**                           | 0.725***                         | 0.514*                              | 0.757***                           |

| Fasting/OGTT-based indices         | Hyperglycaemic clamp – derived measurements |                               |                                  |                                 |                               |                              |                                 |                                |                                    |                                   |                                      |                                     |                                   |                                  |                                     |                                    |
|------------------------------------|---------------------------------------------|-------------------------------|----------------------------------|---------------------------------|-------------------------------|------------------------------|---------------------------------|--------------------------------|------------------------------------|-----------------------------------|--------------------------------------|-------------------------------------|-----------------------------------|----------------------------------|-------------------------------------|------------------------------------|
|                                    | NGT Insulin 1st-phase Spearman              | NGT Insulin 1st-phase Pearson | NGT C-peptide 1st-phase Spearman | NGT C-peptide 1st-phase Pearson | NGT Insulin 2d-phase Spearman | NGT Insulin 2d-phase Pearson | NGT C-peptide 2d-phase Spearman | NGT C-peptide 2d-phase Pearson | IFG/IGT Insulin 1st-phase Spearman | IFG/IGT Insulin 1st-phase Pearson | IFG/IGT C-peptide 1st-phase Spearman | IFG/IGT C-peptide 1st-phase Pearson | IFG/IGT Insulin 2d-phase Spearman | IFG/IGT Insulin 2d-phase Pearson | IFG/IGT C-peptide 2d-phase Spearman | IFG/IGT C-peptide 2d-phase Pearson |
|                                    | BIGTT-AIR <sub>0-30-120</sub>               | 0.692***                      | 0.919***                         | 0.621***                        | 0.868***                      | 0.586***                     | 0.855***                        | 0.43**                         | 0.81***                            | 0.634**                           | 0.851***                             | 0.626**                             | 0.868***                          | 0.617**                          | 0.874***                            | 0.632**                            |
| BIGTT-AIR <sub>0-60-120</sub>      | 0.576***                                    | 0.718***                      | 0.472***                         | 0.711***                        | 0.53***                       | 0.701***                     | 0.357*                          | 0.663***                       | 0.78***                            | 0.8***                            | 0.745***                             | 0.828***                            | 0.736***                          | 0.823***                         | 0.73***                             | 0.807***                           |
| CIR <sub>120</sub>                 | 0.526***                                    | 0.638***                      | 0.382*                           | 0.508***                        | 0.531***                      | 0.573***                     | 0.445**                         | 0.502***                       | 0.601**                            | 0.33                              | 0.633**                              | 0.42                                | 0.581**                           | 0.462*                           | 0.578**                             | 0.479*                             |
| CIR <sub>30</sub>                  | 0.615***                                    | 0.695***                      | 0.555***                         | 0.63***                         | 0.626***                      | 0.542***                     | 0.51***                         | 0.566***                       | 0.67***                            | 0.725***                          | 0.653***                             | 0.71***                             | 0.608**                           | 0.739***                         | 0.651**                             | 0.663***                           |
| CIR <sub>60</sub>                  | 0.45**                                      | 0.387**                       | 0.353*                           | 0.229                           | 0.523***                      | 0.397**                      | 0.398**                         | 0.366*                         | 0.575**                            | -0.061                            | 0.523*                               | -0.095                              | 0.565**                           | -0.067                           | 0.533**                             | -0.085                             |
| CP <sub>120</sub> /CP <sub>0</sub> | -0.184                                      | -0.192                        | -0.215                           | -0.307*                         | -0.061                        | -0.244                       | -0.2                            | -0.279                         | -0.036                             | -0.236                            | 0.106                                | -0.112                              | -0.135                            | -0.27                            | 0.099                               | 0.016                              |
| CP <sub>30</sub> /CP <sub>0</sub>  | -0.044                                      | 0.076                         | -0.009                           | 0.011                           | -0.03                         | -0.055                       | -0.08                           | -0.108                         | 0.234                              | 0.017                             | 0.212                                | 0.111                               | 0.155                             | -0.037                           | 0.209                               | 0.171                              |
| CP <sub>60</sub> /CP <sub>0</sub>  | -0.037                                      | -0.063                        | 0.001                            | -0.162                          | 0.014                         | -0.104                       | -0.009                          | -0.143                         | 0.091                              | -0.119                            | 0.051                                | -0.061                              | 0.09                              | -0.154                           | 0.046                               | 0.003                              |
| CP <sub>0</sub>                    | 0.412**                                     | 0.415**                       | 0.457**                          | 0.58***                         | 0.454**                       | 0.537***                     | 0.516***                        | 0.572***                       | 0.541**                            | 0.731***                          | 0.524*                               | 0.749***                            | 0.433*                            | 0.775***                         | 0.324                               | 0.667***                           |
| CP <sub>0</sub> /G <sub>0</sub>    | 0.513***                                    | 0.661***                      | 0.535***                         | 0.681***                        | 0.466***                      | 0.657***                     | 0.525***                        | 0.703***                       | 0.649**                            | 0.723***                          | 0.628**                              | 0.76***                             | 0.484*                            | 0.742***                         | 0.411                               | 0.67***                            |
| CP <sub>120</sub>                  | 0.215                                       | 0.449**                       | 0.219                            | 0.31*                           | 0.419**                       | 0.355*                       | 0.352*                          | 0.44**                         | 0.452*                             | 0.229                             | 0.57**                               | 0.339                               | 0.249                             | 0.234                            | 0.405                               | 0.401                              |

| Fasting/OGTT-based indices          | Hyperglycaemic clamp – derived measurements |                               |                                  |                                 |                               |                              |                                 |                                |                                    |                                   |                                      |                                     |                                   |                                  |                                     |                                    |
|-------------------------------------|---------------------------------------------|-------------------------------|----------------------------------|---------------------------------|-------------------------------|------------------------------|---------------------------------|--------------------------------|------------------------------------|-----------------------------------|--------------------------------------|-------------------------------------|-----------------------------------|----------------------------------|-------------------------------------|------------------------------------|
|                                     | NGT Insulin 1st-phase Spearman              | NGT Insulin 1st-phase Pearson | NGT C-peptide 1st-phase Spearman | NGT C-peptide 1st-phase Pearson | NGT Insulin 2d-phase Spearman | NGT Insulin 2d-phase Pearson | NGT C-peptide 2d-phase Spearman | NGT C-peptide 2d-phase Pearson | IFG/IGT Insulin 1st-phase Spearman | IFG/IGT Insulin 1st-phase Pearson | IFG/IGT C-peptide 1st-phase Spearman | IFG/IGT C-peptide 1st-phase Pearson | IFG/IGT Insulin 2d-phase Spearman | IFG/IGT Insulin 2d-phase Pearson | IFG/IGT C-peptide 2d-phase Spearman | IFG/IGT C-peptide 2d-phase Pearson |
| CP <sub>120</sub> /G <sub>120</sub> | 0.46**                                      | 0.612***                      | 0.517***                         | 0.499***                        | 0.498***                      | 0.477***                     | 0.57***                         | 0.578***                       | 0.401                              | 0.129                             | 0.508*                               | 0.2                                 | 0.25                              | 0.158                            | 0.412                               | 0.25                               |
| CP <sub>30</sub>                    | 0.411**                                     | 0.672***                      | 0.465***                         | 0.661***                        | 0.503***                      | 0.592***                     | 0.509***                        | 0.587***                       | 0.764***                           | 0.722***                          | 0.718***                             | 0.785***                            | 0.631**                           | 0.726***                         | 0.535*                              | 0.723***                           |
| CP <sub>30</sub> /G <sub>30</sub>   | 0.43**                                      | 0.654***                      | 0.462***                         | 0.546***                        | 0.463**                       | 0.431**                      | 0.43**                          | 0.517***                       | 0.742***                           | 0.751***                          | 0.742***                             | 0.789***                            | 0.612**                           | 0.763***                         | 0.636**                             | 0.721***                           |
| CP <sub>60</sub>                    | 0.437**                                     | 0.579***                      | 0.524***                         | 0.533***                        | 0.605***                      | 0.554***                     | 0.636***                        | 0.608***                       | 0.613**                            | 0.541**                           | 0.581**                              | 0.604**                             | 0.51*                             | 0.543**                          | 0.411                               | 0.568**                            |
| CP <sub>60</sub> /G <sub>60</sub>   | 0.492***                                    | 0.638***                      | 0.524***                         | 0.505***                        | 0.539***                      | 0.428**                      | 0.546***                        | 0.508***                       | 0.504*                             | 0.559**                           | 0.508*                               | 0.565**                             | 0.397                             | 0.561**                          | 0.382                               | 0.493*                             |
| HOMA-%B                             | 0.577***                                    | 0.616***                      | 0.407**                          | 0.686***                        | 0.48***                       | 0.692***                     | 0.318*                          | 0.563***                       | 0.688***                           | 0.733***                          | 0.608**                              | 0.784***                            | 0.66***                           | 0.766***                         | 0.552**                             | 0.81***                            |
| HOMA2-%B(CP)                        | 0.517***                                    | 0.658***                      | 0.51***                          | 0.656***                        | 0.403**                       | 0.6***                       | 0.42**                          | 0.581***                       | 0.704***                           | 0.59**                            | 0.718***                             | 0.665***                            | 0.519*                            | 0.563**                          | 0.537*                              | 0.58**                             |
| HOMA2-%B(I)                         | 0.49**                                      | 0.668***                      | 0.494**                          | 0.751***                        | 0.429**                       | 0.727***                     | 0.401*                          | 0.709***                       | 0.678***                           | 0.706***                          | 0.574**                              | 0.76***                             | 0.64**                            | 0.734***                         | 0.52*                               | 0.787***                           |
| I <sub>0</sub>                      | 0.473***                                    | 0.39**                        | 0.338*                           | 0.568***                        | 0.542***                      | 0.586***                     | 0.391**                         | 0.47***                        | 0.618**                            | 0.769***                          | 0.511*                               | 0.8***                              | 0.621**                           | 0.842***                         | 0.463*                              | 0.832***                           |
| I <sub>0</sub> /G <sub>0</sub>      | 0.498***                                    | 0.475***                      | 0.349*                           | 0.632***                        | 0.539***                      | 0.645***                     | 0.38**                          | 0.499***                       | 0.695***                           | 0.771***                          | 0.607**                              | 0.808***                            | 0.678***                          | 0.831***                         | 0.548**                             | 0.837***                           |
| I <sub>120</sub>                    | 0.341*                                      | 0.645***                      | 0.286*                           | 0.53***                         | 0.585***                      | 0.611***                     | 0.37**                          | 0.631***                       | 0.633**                            | 0.399                             | 0.636**                              | 0.529**                             | 0.541**                           | 0.466*                           | 0.509*                              | 0.643***                           |
| I <sub>120</sub> /G <sub>120</sub>  | 0.475***                                    | 0.755***                      | 0.397**                          | 0.65***                         | 0.686***                      | 0.721***                     | 0.518***                        | 0.733***                       | 0.623**                            | 0.437*                            | 0.615**                              | 0.567**                             | 0.547**                           | 0.531**                          | 0.517*                              | 0.68***                            |

| Fasting/OGTT-based indices       | Hyperglycaemic clamp – derived measurements |                               |                                  |                                 |                               |                              |                                 |                                |                                    |                                   |                                      |                                     |                                   |                                  |                                     |                                    |
|----------------------------------|---------------------------------------------|-------------------------------|----------------------------------|---------------------------------|-------------------------------|------------------------------|---------------------------------|--------------------------------|------------------------------------|-----------------------------------|--------------------------------------|-------------------------------------|-----------------------------------|----------------------------------|-------------------------------------|------------------------------------|
|                                  | NGT Insulin 1st-phase Spearman              | NGT Insulin 1st-phase Pearson | NGT C-peptide 1st-phase Spearman | NGT C-peptide 1st-phase Pearson | NGT Insulin 2d-phase Spearman | NGT Insulin 2d-phase Pearson | NGT C-peptide 2d-phase Spearman | NGT C-peptide 2d-phase Pearson | IFG/IGT Insulin 1st-phase Spearman | IFG/IGT Insulin 1st-phase Pearson | IFG/IGT C-peptide 1st-phase Spearman | IFG/IGT C-peptide 1st-phase Pearson | IFG/IGT Insulin 2d-phase Spearman | IFG/IGT Insulin 2d-phase Pearson | IFG/IGT C-peptide 2d-phase Spearman | IFG/IGT C-peptide 2d-phase Pearson |
|                                  | I <sub>30</sub>                             | 0.706***                      | 0.902***                         | 0.641***                        | 0.871***                      | 0.704***                     | 0.901***                        | 0.595***                       | 0.718***                           | 0.669***                          | 0.775***                             | 0.6**                               | 0.813***                          | 0.58**                           | 0.807***                            | 0.545**                            |
| ΔI <sub>30</sub>                 | 0.694***                                    | 0.882***                      | 0.626***                         | 0.85***                         | 0.684***                      | 0.881***                     | 0.571***                        | 0.689***                       | 0.63**                             | 0.753***                          | 0.593**                              | 0.79***                             | 0.557**                           | 0.775***                         | 0.552**                             | 0.781***                           |
| I <sub>30</sub> /G <sub>30</sub> | 0.742***                                    | 0.901***                      | 0.663***                         | 0.885***                        | 0.732***                      | 0.882***                     | 0.587***                        | 0.77***                        | 0.676***                           | 0.83***                           | 0.648***                             | 0.845***                            | 0.587**                           | 0.855***                         | 0.624**                             | 0.818***                           |
| I <sub>60</sub>                  | 0.507***                                    | 0.496***                      | 0.454**                          | 0.629***                        | 0.656***                      | 0.683***                     | 0.543***                        | 0.594***                       | 0.561**                            | 0.555**                           | 0.503*                               | 0.637**                             | 0.536**                           | 0.622**                          | 0.433*                              | 0.682***                           |
| ΔI <sub>60</sub>                 | 0.49***                                     | 0.48***                       | 0.454**                          | 0.614***                        | 0.651***                      | 0.671***                     | 0.545***                        | 0.577***                       | 0.537**                            | 0.522*                            | 0.477*                               | 0.607**                             | 0.503*                            | 0.586**                          | 0.403                               | 0.653***                           |
| I <sub>60</sub> /G <sub>60</sub> | 0.612***                                    | 0.722***                      | 0.542***                         | 0.755***                        | 0.725***                      | 0.8***                       | 0.606***                        | 0.714***                       | 0.645**                            | 0.698***                          | 0.577**                              | 0.753***                            | 0.593**                           | 0.753***                         | 0.509*                              | 0.763***                           |
| IGI <sub>120</sub>               | 0.538***                                    | 0.534***                      | 0.532**                          | 0.483**                         | 0.578***                      | 0.534***                     | 0.564***                        | 0.458**                        | 0.219                              | 0.156                             | 0.256                                | 0.229                               | 0.273                             | 0.233                            | 0.319                               | 0.371                              |
| IGI <sub>30</sub>                | 0.632***                                    | 0.678***                      | 0.584***                         | 0.641***                        | 0.683***                      | 0.583***                     | 0.569***                        | 0.595***                       | 0.625**                            | 0.461*                            | 0.615**                              | 0.437*                              | 0.534**                           | 0.466*                           | 0.602**                             | 0.407                              |
| IGI <sub>60</sub>                | 0.42**                                      | 0.234                         | 0.401**                          | 0.255                           | 0.617***                      | 0.332*                       | 0.546***                        | 0.356*                         | 0.723***                           | 0.426*                            | 0.641***                             | 0.453*                              | 0.733***                          | 0.555**                          | 0.6**                               | 0.414*                             |
| I <sub>120</sub> /I <sub>0</sub> | -0.051                                      | 0.15                          | -0.021                           | 0.015                           | 0.137                         | 0.085                        | 0.058                           | 0.104                          | 0.146                              | -0.08                             | 0.205                                | 0.031                               | 0.04                              | -0.111                           | 0.077                               | 0.066                              |
| I <sub>30</sub> /I <sub>0</sub>  | 0.134                                       | 0.364*                        | 0.263                            | 0.41**                          | 0.146                         | 0.335*                       | 0.189                           | 0.304*                         | 0.268                              | 0.064                             | 0.268                                | 0.089                               | 0.213                             | 0.037                            | 0.28                                | 0.081                              |
| I <sub>60</sub> /I <sub>0</sub>  | 0.115                                       | 0.077                         | 0.181                            | 0.1                             | 0.263                         | 0.162                        | 0.264                           | 0.133                          | 0.166                              | -0.007                            | 0.141                                | 0.057                               | 0.132                             | -0.025                           | 0.093                               | 0.064                              |

| Fasting/OGTT-based indices | Hyperglycaemic clamp – derived measurements |                                 |                                    |                                   |                                 |                                |                                   |                                  |                                         |                                        |                                           |                                          |                                        |                                       |                                          |                                         |
|----------------------------|---------------------------------------------|---------------------------------|------------------------------------|-----------------------------------|---------------------------------|--------------------------------|-----------------------------------|----------------------------------|-----------------------------------------|----------------------------------------|-------------------------------------------|------------------------------------------|----------------------------------------|---------------------------------------|------------------------------------------|-----------------------------------------|
|                            | NGT                                         | NGT                             | NGT                                | NGT                               | NGT                             | NGT                            | NGT                               | NGT                              | IFG/                                    | IFG/                                   | IFG/                                      | IFG/                                     | IFG/                                   | IFG/                                  | IFG/                                     | IFG/                                    |
|                            | Insulin<br>1st-phase<br>Spearman            | Insulin<br>1st-phase<br>Pearson | C-peptide<br>1st-phase<br>Spearman | C-peptide<br>1st-phase<br>Pearson | Insulin<br>2d-phase<br>Spearman | Insulin<br>2d-phase<br>Pearson | C-peptide<br>2d-phase<br>Spearman | C-peptide<br>2d-phase<br>Pearson | IGT<br>Insulin<br>1st-phase<br>Spearman | IGT<br>Insulin<br>1st-phase<br>Pearson | IGT<br>C-peptide<br>1st-phase<br>Spearman | IGT<br>C-peptide<br>1st-phase<br>Pearson | IGT<br>Insulin<br>2d-phase<br>Spearman | IGT<br>Insulin<br>2d-phase<br>Pearson | IGT<br>C-peptide<br>2d-phase<br>Spearman | IGT<br>C-peptide<br>2d-phase<br>Pearson |
| Kadowaki model             | 0.702***                                    | 0.875***                        | 0.627***                           | 0.861***                          | 0.696***                        | 0.858***                       | 0.542***                          | 0.737***                         | 0.636**                                 | 0.803***                               | 0.608**                                   | 0.817***                                 | 0.543**                                | 0.82***                               | 0.567**                                  | 0.785***                                |
| log(I <sub>0</sub> )       | 0.504***                                    | 0.481***                        | 0.377**                            | 0.534***                          | 0.569***                        | 0.571***                       | 0.427**                           | 0.524***                         | 0.618**                                 | 0.705***                               | 0.511*                                    | 0.746***                                 | 0.621**                                | 0.766***                              | 0.463*                                   | 0.759***                                |
| log(I <sub>120</sub> )     | 0.341*                                      | 0.466***                        | 0.286*                             | 0.4**                             | 0.585***                        | 0.515***                       | 0.37**                            | 0.488***                         | 0.633**                                 | 0.471*                                 | 0.636**                                   | 0.586**                                  | 0.541**                                | 0.497*                                | 0.509*                                   | 0.612**                                 |
| log(I <sub>30</sub> )      | 0.706***                                    | 0.794***                        | 0.641***                           | 0.804***                          | 0.704***                        | 0.809***                       | 0.595***                          | 0.705***                         | 0.669***                                | 0.651***                               | 0.6**                                     | 0.705***                                 | 0.58**                                 | 0.679***                              | 0.545**                                  | 0.701***                                |
| log(I <sub>60</sub> )      | 0.507***                                    | 0.456**                         | 0.454**                            | 0.538***                          | 0.656***                        | 0.604***                       | 0.543***                          | 0.553***                         | 0.561**                                 | 0.47*                                  | 0.503*                                    | 0.509*                                   | 0.536**                                | 0.505*                                | 0.433*                                   | 0.499*                                  |
| log(I <sub>90</sub> )      | 0.35*                                       | 0.464***                        | 0.317*                             | 0.46***                           | 0.564***                        | 0.539***                       | 0.468***                          | 0.557***                         | 0.404                                   | 0.289                                  | 0.357                                     | 0.381                                    | 0.425*                                 | 0.37                                  | 0.265                                    | 0.412                                   |
| CPI <sub>0</sub>           | 0.513***                                    | 0.661***                        | 0.535***                           | 0.681***                          | 0.466***                        | 0.657***                       | 0.525***                          | 0.703***                         | 0.649**                                 | 0.723***                               | 0.628**                                   | 0.76***                                  | 0.484*                                 | 0.742***                              | 0.411                                    | 0.67***                                 |
| CPI <sub>120</sub>         | 0.46**                                      | 0.612***                        | 0.517***                           | 0.499***                          | 0.498***                        | 0.477***                       | 0.57***                           | 0.578***                         | 0.401                                   | 0.129                                  | 0.508*                                    | 0.2                                      | 0.25                                   | 0.158                                 | 0.412                                    | 0.25                                    |
| first-phase Stumvoll       | 0.701***                                    | 0.859***                        | 0.636***                           | 0.867***                          | 0.717***                        | 0.87***                        | 0.577***                          | 0.761***                         | 0.644**                                 | 0.796***                               | 0.617**                                   | 0.818***                                 | 0.58**                                 | 0.846***                              | 0.574**                                  | 0.827***                                |
| second-phase Stumvoll      | 0.658***                                    | 0.864***                        | 0.576***                           | 0.87***                           | 0.675***                        | 0.905***                       | 0.581***                          | 0.732***                         | 0.615**                                 | 0.772***                               | 0.559**                                   | 0.809***                                 | 0.548**                                | 0.814***                              | 0.468*                                   | 0.812**                                 |



**Supplementary Table 3: Correlation between fasting and OGTT-derived insulin secretion indices and GLP-1-stimulated insulin (C-peptide) secretion**

| Indices                                                              | NGT-group(n=49). |                  |                 |                 | IFG and/or IGT -group (n=23). |                  |                 |                 |
|----------------------------------------------------------------------|------------------|------------------|-----------------|-----------------|-------------------------------|------------------|-----------------|-----------------|
|                                                                      | Insulin          | C-peptide        | Insulin         | C-peptide       | Insulin                       | C-peptide        | Insulin         | C-peptide       |
|                                                                      | GLP1<br>Spearman | GLP1<br>Spearman | GLP1<br>Pearson | GLP1<br>Pearson | GLP1<br>Spearman              | GLP1<br>Spearman | GLP1<br>Pearson | GLP1<br>Pearson |
| AUC <sub>0-120</sub> (CP <sub>0-120</sub> )/AUC(G <sub>0-120</sub> ) | 0.525 ***        | 0.38 **          | 0.511 ***       | 0.45 **         | 0.652 **                      | 0.412            | 0.669 ***       | 0.523 *         |
| AUC(CP <sub>0-30</sub> )/AUC(G <sub>0-30</sub> )                     | 0.509 ***        | 0.395 **         | 0.607 ***       | 0.565 ***       | 0.736 ***                     | 0.557 **         | 0.768 ***       | 0.624 **        |
| AUC <sub>0-60</sub> (CP <sub>0-60</sub> )/AUC(G <sub>0-60</sub> )    | 0.541 ***        | 0.392 **         | 0.546 ***       | 0.483 ***       | 0.651 **                      | 0.374            | 0.685 ***       | 0.541 **        |
| AUC(CP <sub>all</sub> )                                              | 0.484 ***        | 0.343 *          | 0.526 ***       | 0.48 ***        | 0.49 *                        | 0.241            | 0.545 **        | 0.454 *         |
| AUC(I <sub>all</sub> )                                               | 0.613 ***        | 0.414 **         | 0.79 ***        | 0.638 ***       | 0.483 *                       | 0.269            | 0.681 ***       | 0.573 **        |
| AUC(I <sub>0-120</sub> )/AUC(G <sub>0-120</sub> )                    | 0.723 ***        | 0.529 ***        | 0.789 ***       | 0.61 ***        | 0.664 ***                     | 0.414            | 0.75 ***        | 0.615 **        |
| AUC(I <sub>0-30</sub> )/AUC(G <sub>0-30</sub> )                      | 0.728 ***        | 0.54 ***         | 0.775 ***       | 0.57 ***        | 0.725 ***                     | 0.517 *          | 0.799 ***       | 0.706 ***       |
| AUC(I <sub>0-60</sub> )/AUC(G <sub>0-60</sub> )                      | 0.649 ***        | 0.441 **         | 0.756 ***       | 0.59 ***        | 0.588 **                      | 0.327            | 0.717 ***       | 0.587 **        |
| BIGTT-AIR <sub>0-30-120</sub>                                        | 0.631 ***        | 0.466 ***        | 0.715 ***       | 0.6 ***         | 0.66 ***                      | 0.49 *           | 0.771 ***       | 0.675 ***       |
| BIGTT-AIR <sub>0-60-120</sub>                                        | 0.599 ***        | 0.376 **         | 0.761 ***       | 0.703 ***       | 0.682 ***                     | 0.519 *          | 0.741 ***       | 0.619 **        |
| CIR <sub>120</sub>                                                   | 0.435 **         | 0.32 *           | 0.378 *         | 0.266           | 0.608 **                      | 0.38             | 0.529 *         | 0.318           |
| CIR <sub>30</sub>                                                    | 0.669 ***        | 0.523 ***        | 0.545 ***       | 0.41 **         | 0.777 ***                     | 0.642 **         | 0.702 ***       | 0.61 **         |
| CIR <sub>60</sub>                                                    | 0.51 ***         | 0.335 *          | 0.123           | -0.037          | 0.758 ***                     | 0.427 *          | 0.063           | 0.157           |
| CP <sub>120</sub> /CP <sub>0</sub>                                   | -0.252           | -0.372 **        | -0.352 *        | -0.364 *        | -0.119                        | 0.033            | -0.169          | 0.047           |
| CP <sub>30</sub> /CP <sub>0</sub>                                    | -0.031           | -0.038           | -0.077          | -0.107          | 0.238                         | 0.317            | 0.048           | 0.332           |
| CP <sub>60</sub> /CP <sub>0</sub>                                    | -0.05            | -0.103           | -0.161          | -0.207          | -0.005                        | 0.015            | -0.123          | 0.076           |
| CP <sub>0</sub>                                                      | 0.361 *          | 0.304 *          | 0.496 ***       | 0.369 *         | 0.489 *                       | 0.19             | 0.691 ***       | 0.436 *         |
| CP <sub>0</sub> /G <sub>0</sub>                                      | 0.398 **         | 0.357 *          | 0.678 ***       | 0.691 ***       | 0.516 *                       | 0.269            | 0.677 ***       | 0.464 *         |
| CP <sub>120</sub>                                                    | 0.182            | -0.023           | 0.32 *          | 0.321 *         | 0.292                         | 0.234            | 0.312           | 0.303           |
| CP <sub>120</sub> /G <sub>120</sub>                                  | 0.386 **         | 0.29 *           | 0.409 **        | 0.415 **        | 0.5 *                         | 0.321            | 0.252           | 0.185           |
| CP <sub>30</sub>                                                     | 0.445 **         | 0.355 *          | 0.568 ***       | 0.494 ***       | 0.606 **                      | 0.456 *          | 0.685 ***       | 0.602 **        |
| CP <sub>30</sub> /G <sub>30</sub>                                    | 0.506 ***        | 0.397 **         | 0.507 ***       | 0.455 **        | 0.765 ***                     | 0.617 **         | 0.75 ***        | 0.63 **         |
| CP <sub>60</sub>                                                     | 0.512 ***        | 0.387 **         | 0.522 ***       | 0.453 **        | 0.431 *                       | 0.228            | 0.51 *          | 0.437 *         |
| CP <sub>60</sub> /G <sub>60</sub>                                    | 0.539 ***        | 0.38 **          | 0.445 **        | 0.371 **        | 0.595 **                      | 0.334            | 0.608 **        | 0.489 *         |
| HOMA-%B                                                              | 0.431 **         | 0.304 *          | 0.674 ***       | 0.59 ***        | 0.565 **                      | 0.349            | 0.755 ***       | 0.649 ***       |
| HOMA2-%B(CP)                                                         | 0.323 *          | 0.291 *          | 0.552 ***       | 0.531 ***       | 0.582 **                      | 0.396            | 0.553 **        | 0.457 *         |
| HOMA2-%B(I)                                                          | 0.34 *           | 0.344 *          | 0.685 ***       | 0.668 ***       | 0.543 *                       | 0.296            | 0.729 ***       | 0.634 **        |
| I <sub>0</sub>                                                       | 0.471 ***        | 0.29 *           | 0.598 ***       | 0.379 **        | 0.544 **                      | 0.262            | 0.809 ***       | 0.647 ***       |
| I <sub>0</sub> /G <sub>0</sub>                                       | 0.48 ***         | 0.304 *          | 0.623 ***       | 0.407 **        | 0.582 **                      | 0.329            | 0.805 ***       | 0.66 ***        |
| I <sub>120</sub>                                                     | 0.411 **         | 0.174            | 0.583 ***       | 0.542 ***       | 0.339                         | 0.358            | 0.584 **        | 0.561 **        |
| I <sub>120</sub> /G <sub>120</sub>                                   | 0.528 ***        | 0.314 *          | 0.64 ***        | 0.568 ***       | 0.529 *                       | 0.416 *          | 0.656 ***       | 0.587 **        |
| I <sub>30</sub>                                                      | 0.663 ***        | 0.519 ***        | 0.734 ***       | 0.507 ***       | 0.642 **                      | 0.488 *          | 0.759 ***       | 0.689 ***       |
| ΔI <sub>30</sub>                                                     | 0.637 ***        | 0.498 ***        | 0.689 ***       | 0.449 **        | 0.609 **                      | 0.487 *          | 0.726 ***       | 0.676 ***       |
| I <sub>30</sub> /G <sub>30</sub>                                     | 0.747 ***        | 0.567 ***        | 0.757 ***       | 0.548 ***       | 0.726 ***                     | 0.556 **         | 0.792 ***       | 0.698 ***       |

| Indices                          | NGT-group(n=49). |                  |                 |                 | IFG and/or IGT -group (n=23). |                  |                 |                 |
|----------------------------------|------------------|------------------|-----------------|-----------------|-------------------------------|------------------|-----------------|-----------------|
|                                  | Insulin          | C-peptide        | Insulin         | C-peptide       | Insulin                       | C-peptide        | Insulin         | C-peptide       |
|                                  | GLP1<br>Spearman | GLP1<br>Spearman | GLP1<br>Pearson | GLP1<br>Pearson | GLP1<br>Spearman              | GLP1<br>Spearman | GLP1<br>Pearson | GLP1<br>Pearson |
| I <sub>60</sub>                  | 0.556 ***        | 0.362 *          | 0.721 ***       | 0.579 ***       | 0.411                         | 0.204            | 0.641 ***       | 0.527 **        |
| ΔI <sub>60</sub>                 | 0.55 ***         | 0.359 *          | 0.697 ***       | 0.544 ***       | 0.363                         | 0.186            | 0.611 **        | 0.504 *         |
| I <sub>60</sub> /G <sub>60</sub> | 0.696 ***        | 0.498 ***        | 0.748 ***       | 0.561 ***       | 0.627 **                      | 0.363            | 0.744 ***       | 0.6 **          |
| IGI <sub>120</sub>               | 0.568 ***        | 0.541 ***        | 0.295           | 0.247           | 0.358                         | 0.155            | 0.374           | 0.316           |
| IGI <sub>30</sub>                | 0.743 ***        | 0.578 ***        | 0.583 ***       | 0.413 **        | 0.718 ***                     | 0.581 **         | 0.484 *         | 0.473 *         |
| IGI <sub>60</sub>                | 0.524 ***        | 0.344 *          | 0.197           | 0.098           | 0.6 **                        | 0.235            | 0.665 ***       | 0.184           |
| I <sub>120</sub> /I <sub>0</sub> | -0.017           | -0.119           | -0.078          | -0.137          | -0.113                        | 0.089            | -0.073          | 0.04            |
| I <sub>30</sub> /I <sub>0</sub>  | 0.13             | 0.162            | 0.206           | 0.112           | 0.341                         | 0.343            | 0.064           | 0.199           |
| I <sub>60</sub> /I <sub>0</sub>  | 0.198            | 0.121            | 0.124           | 0.031           | 0.042                         | -0.053           | -0.034          | 0.022           |
| Kadowaki model                   | 0.701 ***        | 0.527 ***        | 0.707 ***       | 0.486 ***       | 0.686 ***                     | 0.533 **         | 0.755 ***       | 0.681 ***       |
| log(I <sub>0</sub> )             | 0.503 ***        | 0.333 *          | 0.644 ***       | 0.556 ***       | 0.544 **                      | 0.262            | 0.75 ***        | 0.593 **        |
| log(I <sub>120</sub> )           | 0.411 **         | 0.174            | 0.461 ***       | 0.319 *         | 0.339                         | 0.358            | 0.509 *         | 0.507 *         |
| log(I <sub>30</sub> )            | 0.663 ***        | 0.519 ***        | 0.737 ***       | 0.56 ***        | 0.642 **                      | 0.488 *          | 0.684 ***       | 0.634 **        |
| log(I <sub>60</sub> )            | 0.556 ***        | 0.362 *          | 0.627 ***       | 0.489 ***       | 0.411                         | 0.204            | 0.481 *         | 0.359           |
| log(I <sub>90</sub> )            | 0.319 *          | 0.185            | 0.454 **        | 0.384 **        | 0.339                         | 0.11             | 0.461 *         | 0.335           |
| CPI <sub>0</sub>                 | 0.398 **         | 0.357 *          | 0.678 ***       | 0.691 ***       | 0.516 *                       | 0.269            | 0.677 ***       | 0.464 *         |
| CPI <sub>120</sub>               | 0.386 **         | 0.29 *           | 0.409 **        | 0.415 **        | 0.5 *                         | 0.321            | 0.252           | 0.185           |
| first-phase<br>Stumvoll          | 0.739 ***        | 0.573 ***        | 0.815 ***       | 0.617 ***       | 0.757 ***                     | 0.545 **         | 0.831 ***       | 0.706 ***       |
| second-phase<br>Stumvoll         | 0.6 ***          | 0.468 ***        | 0.776 ***       | 0.582 ***       | 0.544 **                      | 0.345            | 0.758 ***       | 0.665 ***       |

**Supplementary Table 4: Fasting- and OGTT-derived measures of beta cell function**

| <b>Fasting/OGTT-based indices</b>                    | <b>Formula</b>                                                                                                                                                                                                           |
|------------------------------------------------------|--------------------------------------------------------------------------------------------------------------------------------------------------------------------------------------------------------------------------|
| AUC (CP <sub>0-120</sub> )/AUC (G <sub>0-120</sub> ) | AUC for insulin, glucose and C-peptide were calculated with the trapezoid method                                                                                                                                         |
| AUC(CP <sub>0-30</sub> )/AUC(G <sub>0-30</sub> )     |                                                                                                                                                                                                                          |
| AUC (CP <sub>0-60</sub> )/AUC (G <sub>0-60</sub> )   |                                                                                                                                                                                                                          |
| AUC(CP <sub>all</sub> )                              |                                                                                                                                                                                                                          |
| AUC(I <sub>all</sub> )                               |                                                                                                                                                                                                                          |
| AUC(I <sub>0-120</sub> )/AUC(G <sub>0-120</sub> )    |                                                                                                                                                                                                                          |
| AUC(I <sub>0-30</sub> )/AUC(G <sub>0-30</sub> )      |                                                                                                                                                                                                                          |
| AUC(I <sub>0-60</sub> )/AUC(G <sub>0-60</sub> )      |                                                                                                                                                                                                                          |
| BIGTT-AIR <sub>0-30-120</sub>                        | $\exp[8.20 + (0.00178 \times I_0) + (0.00168 \times I_{30}) - (0.000383 \times I_{120}) - (0.314 \times G_0) - (0.109 \times G_{30}) + (0.0781 \times G_{120}) + (0.180 \times \text{sex}) + (0.032 \times \text{BMI})]$ |
| BIGTT-AIR <sub>0-60-120</sub>                        | $\exp[8.20 + (0.00178 \times I_0) + (0.00168 \times I_{60}) - (0.000383 \times I_{120}) - (0.314 \times G_0) - (0.109 \times G_{60}) + (0.0781 \times G_{120}) + (0.180 \times \text{sex}) + (0.032 \times \text{BMI})]$ |
| CIR <sub>120</sub>                                   | $I_{120} / (G_{120} \times (G_{120} - 3.89))$                                                                                                                                                                            |
| CIR <sub>30</sub>                                    | $I_{30} / (G_{30} \times (G_{30} - 3.89))$                                                                                                                                                                               |
| CIR <sub>60</sub>                                    | $I_{60} / (G_{60} \times (G_{60} - 3.89))$                                                                                                                                                                               |
| CP <sub>120</sub> /CP <sub>0</sub>                   | CP <sub>120</sub> /CP <sub>0</sub>                                                                                                                                                                                       |
| CP <sub>30</sub> /CP <sub>0</sub>                    | CP <sub>30</sub> /CP <sub>0</sub>                                                                                                                                                                                        |
| CP <sub>60</sub> /CP <sub>0</sub>                    | CP <sub>60</sub> /CP <sub>0</sub>                                                                                                                                                                                        |
| CP <sub>0</sub>                                      |                                                                                                                                                                                                                          |
| CP <sub>0</sub> /G <sub>0</sub>                      | CP <sub>0</sub> /G <sub>0</sub>                                                                                                                                                                                          |
| CP <sub>120</sub>                                    |                                                                                                                                                                                                                          |
| CP <sub>120</sub> /G <sub>120</sub>                  | CP <sub>120</sub> /G <sub>120</sub>                                                                                                                                                                                      |
| CP <sub>30</sub>                                     |                                                                                                                                                                                                                          |
| CP <sub>30</sub> /G <sub>30</sub>                    | CP <sub>30</sub> /G <sub>30</sub>                                                                                                                                                                                        |
| CP <sub>60</sub>                                     |                                                                                                                                                                                                                          |
| CP <sub>60</sub> /G <sub>60</sub>                    | CP <sub>60</sub> /G <sub>60</sub>                                                                                                                                                                                        |
| HOMA-%B                                              | $(20 \times I_0) / (G_0 - 3.5)$                                                                                                                                                                                          |
| HOMA2-%B(CP)                                         | <a href="https://www.dtu.ox.ac.uk/homacalculator/">https://www.dtu.ox.ac.uk/homacalculator/</a>                                                                                                                          |
| HOMA2-%B(I)                                          | <a href="https://www.dtu.ox.ac.uk/homacalculator/">https://www.dtu.ox.ac.uk/homacalculator/</a>                                                                                                                          |
| I <sub>0</sub>                                       |                                                                                                                                                                                                                          |
| I <sub>0</sub> /G <sub>0</sub>                       | I <sub>0</sub> /G <sub>0</sub>                                                                                                                                                                                           |
| I <sub>120</sub>                                     |                                                                                                                                                                                                                          |
| I <sub>120</sub> /G <sub>120</sub>                   | I <sub>120</sub> /G <sub>120</sub>                                                                                                                                                                                       |
| I <sub>30</sub>                                      |                                                                                                                                                                                                                          |
| ΔI <sub>30</sub>                                     | I <sub>30</sub> - I <sub>0</sub>                                                                                                                                                                                         |
| I <sub>30</sub> /G <sub>30</sub>                     | I <sub>30</sub> /G <sub>30</sub>                                                                                                                                                                                         |
| I <sub>60</sub>                                      |                                                                                                                                                                                                                          |
| ΔI <sub>60</sub>                                     | I <sub>60</sub> - I <sub>0</sub>                                                                                                                                                                                         |
| I <sub>60</sub> /G <sub>60</sub>                     | I <sub>60</sub> /G <sub>60</sub>                                                                                                                                                                                         |
| IGI <sub>120</sub>                                   | $(I_{120} - I_0) / (G_{120} - G_0)$                                                                                                                                                                                      |
| IGI <sub>30</sub>                                    | $(I_{30} - I_0) / (G_{30} - G_0)$                                                                                                                                                                                        |
| IGI <sub>60</sub>                                    | $(I_{60} - I_0) / (G_{60} - G_0)$                                                                                                                                                                                        |
| I <sub>120</sub> /I <sub>0</sub>                     | I <sub>120</sub> /I <sub>0</sub>                                                                                                                                                                                         |

|                       |                                                                       |
|-----------------------|-----------------------------------------------------------------------|
| $I_{30}/I_0$          | $I_{30}/I_0$                                                          |
| $I_{60}/I_0$          | $I_{60}/I_0$                                                          |
| Kadowaki model        | $(I_{30} - I_0)/(G_{30} - G_0)$                                       |
| $\log(I_0)$           | $\log(I_0)$                                                           |
| $\log(I_{120})$       | $\log(I_{120})$                                                       |
| $\log(I_{30})$        | $\log(I_{30})$                                                        |
| $\log(I_{60})$        | $\log(I_{60})$                                                        |
| $\log(I_{90})$        | $\log(I_{90})$                                                        |
| $CPI_0$               | $100 \times CP_0(\text{ng/mL})/G_0(\text{mg/dL})$                     |
| $CPI_{120}$           | $100 \times CP_{120}(\text{ng/mL})/G_{120}(\text{mg/dL})$             |
| first-phase Stumvoll  | $1283 + 1.829 \times I_{30} - 138.7 \times G_{30} + 3.772 \times I_0$ |
| second-phase Stumvoll | $286 + 0.416 \times I_{30} - 25.94 \times G_{30} + 0.926 \times I_0$  |

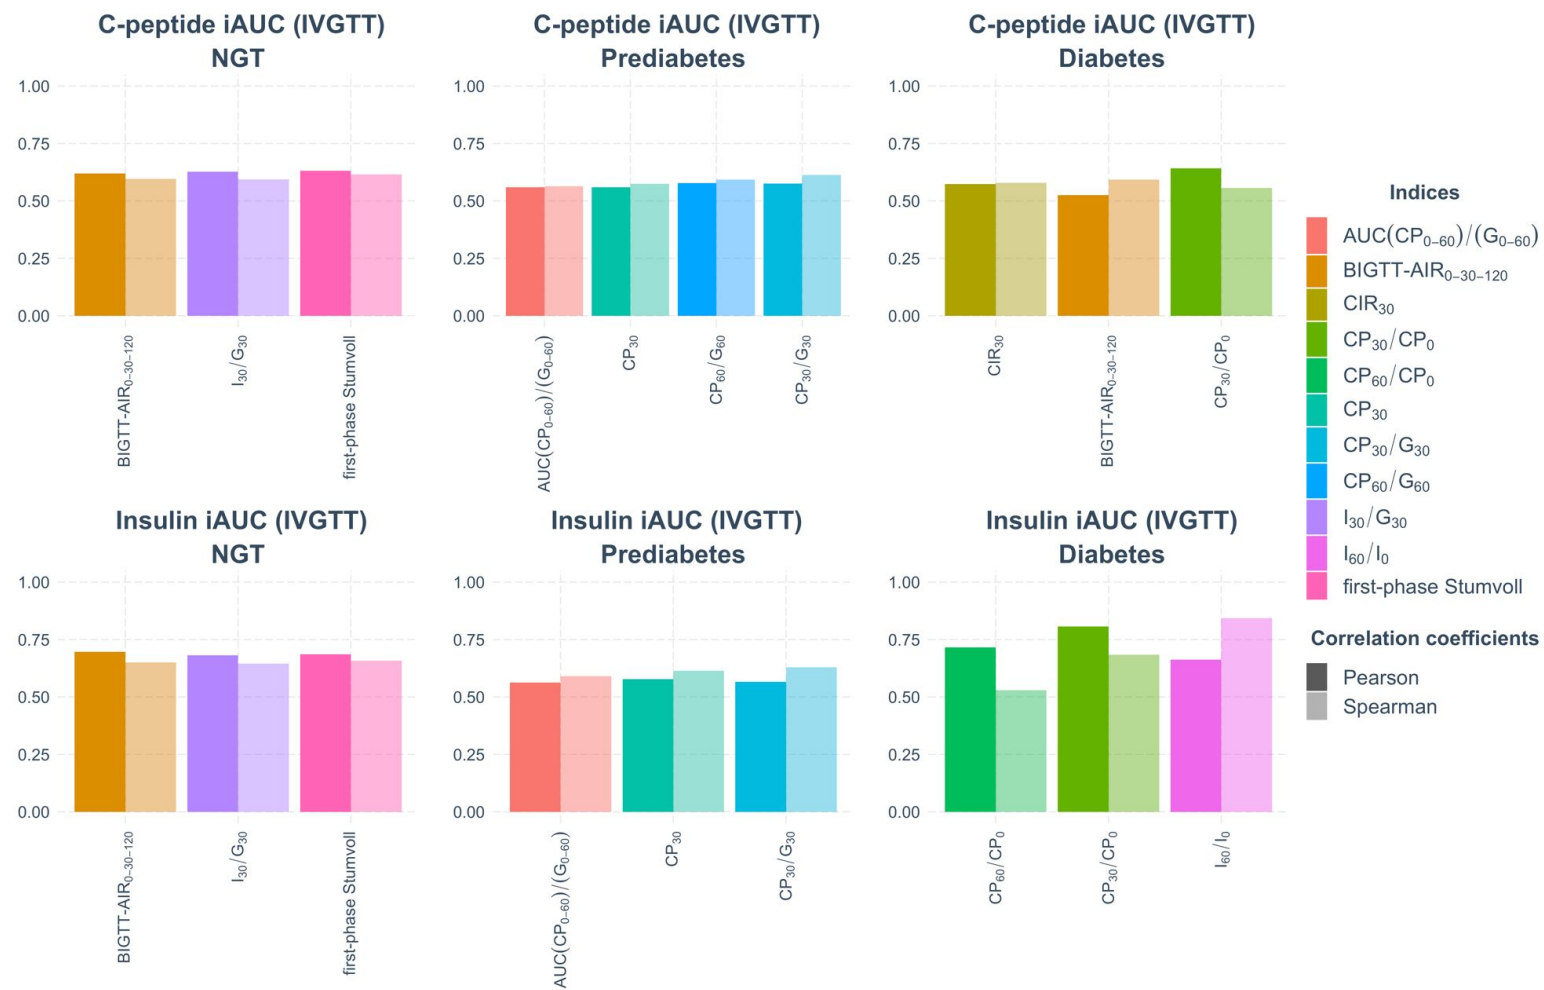

Supplementary Figure 1: Top-3 indices by Spearman's and Pearson's correlation coefficients in subsets with T2D, prediabetes and NGT compared to first-phase IVGTT

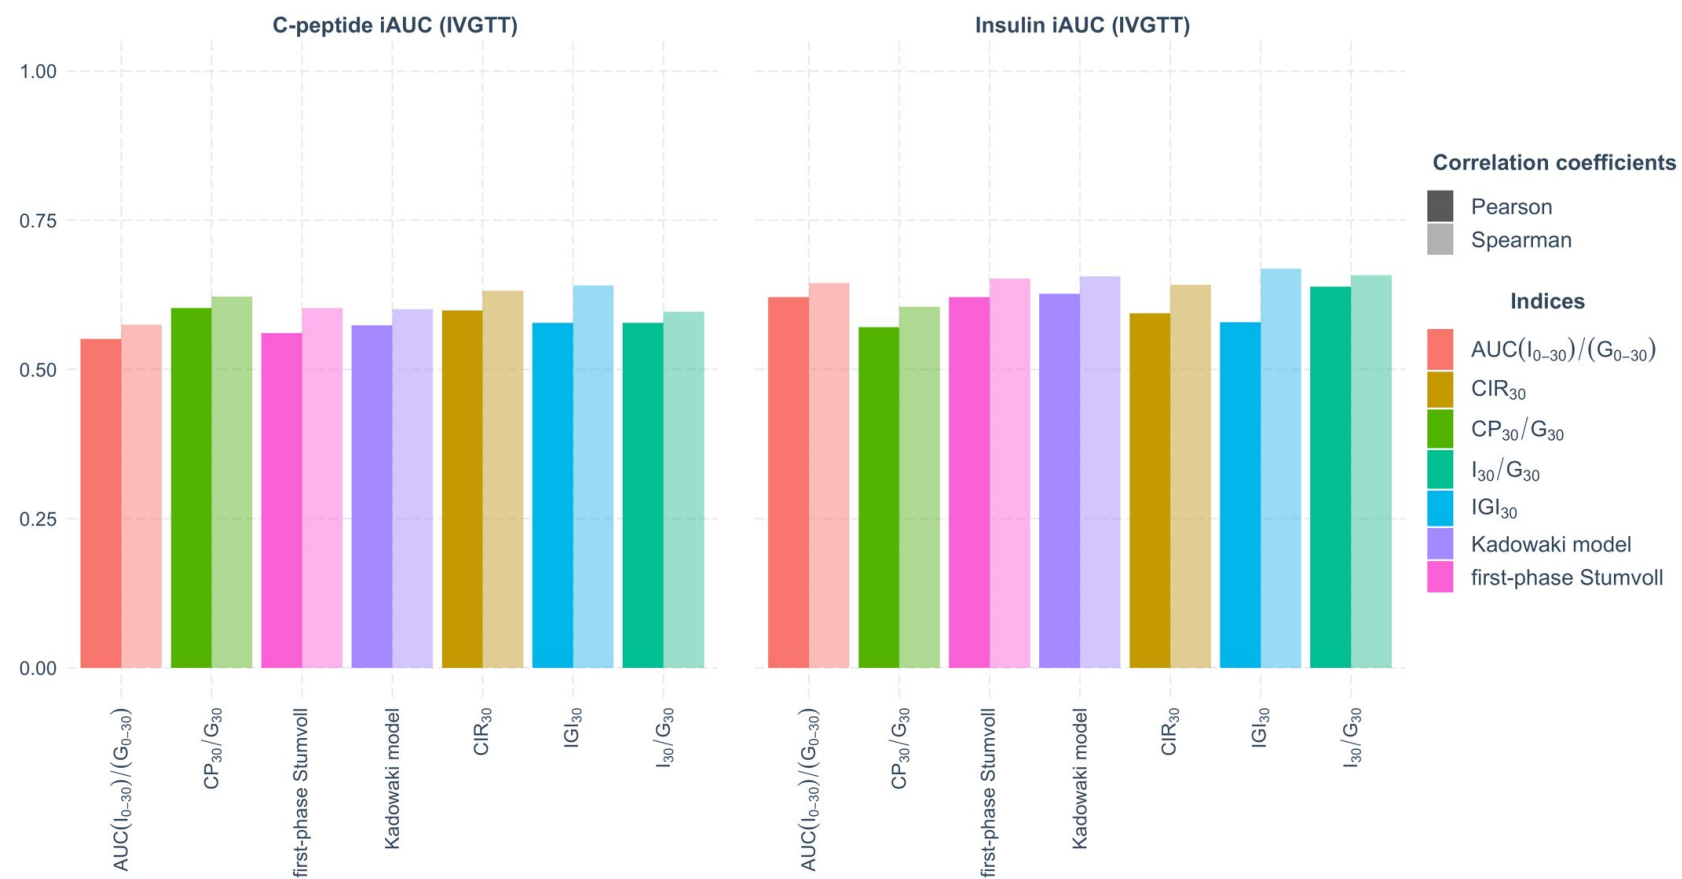

Supplementary Figure 2: Top indices by Spearman's and Pearson's correlation coefficients in the entire cohort (n=316) compared to first-phase IVGTT

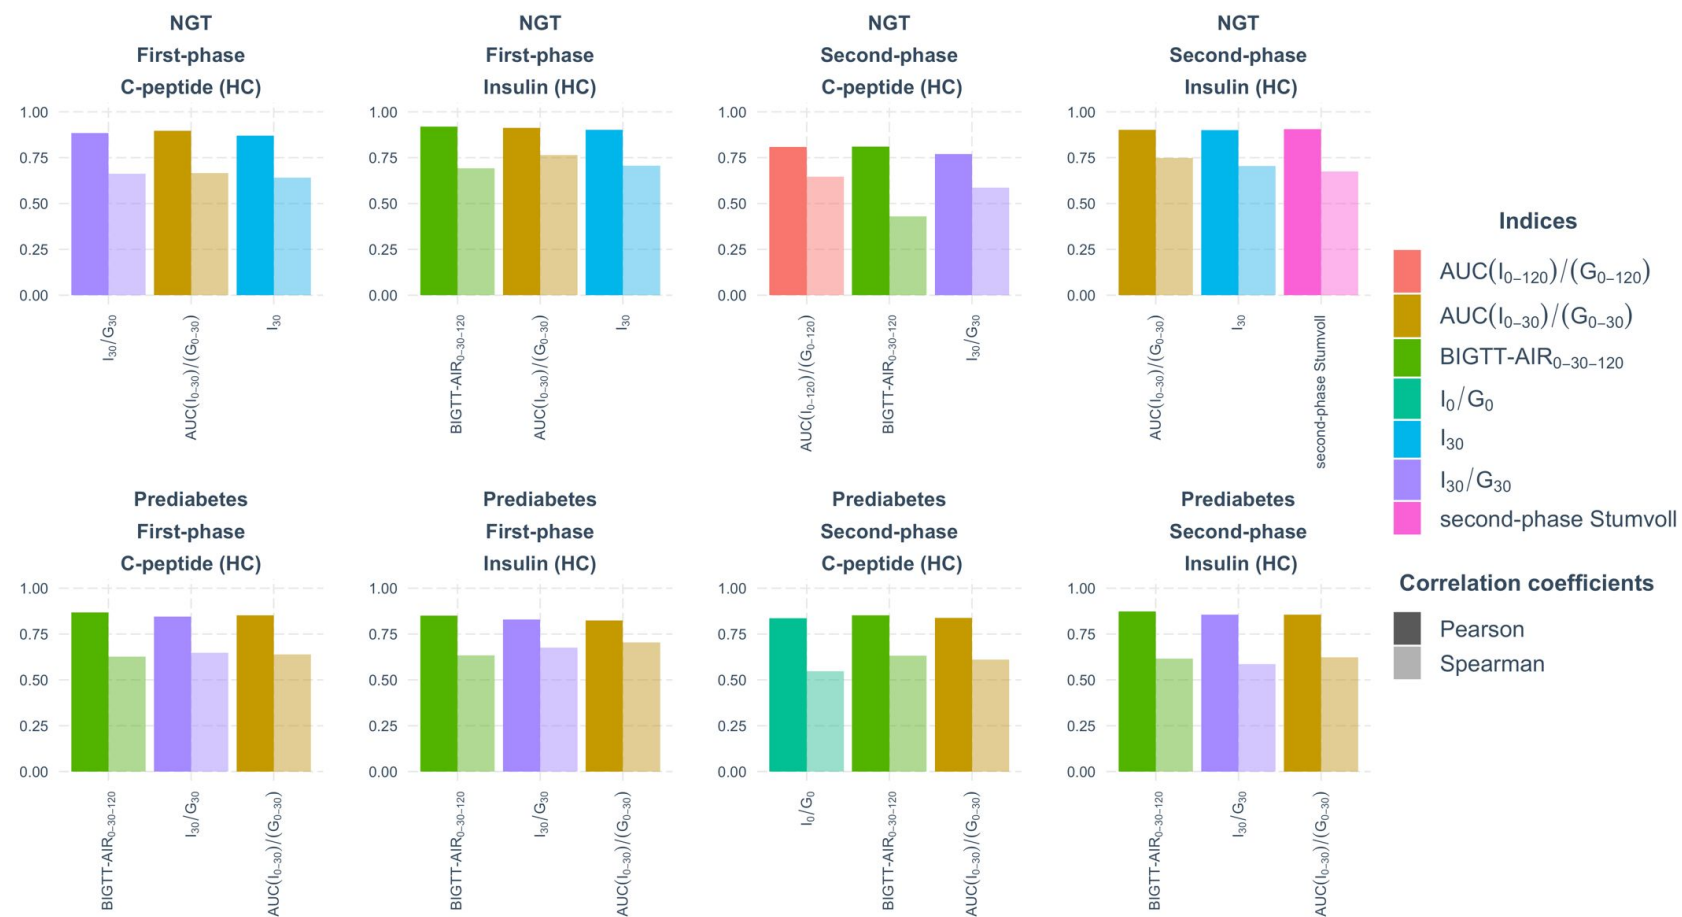

Supplementary Figure 3: Top-indices by Spearman's and Pearson's correlation coefficients in NGT and prediabetes groups compared to first- and second phase hyperglycaemic clamp

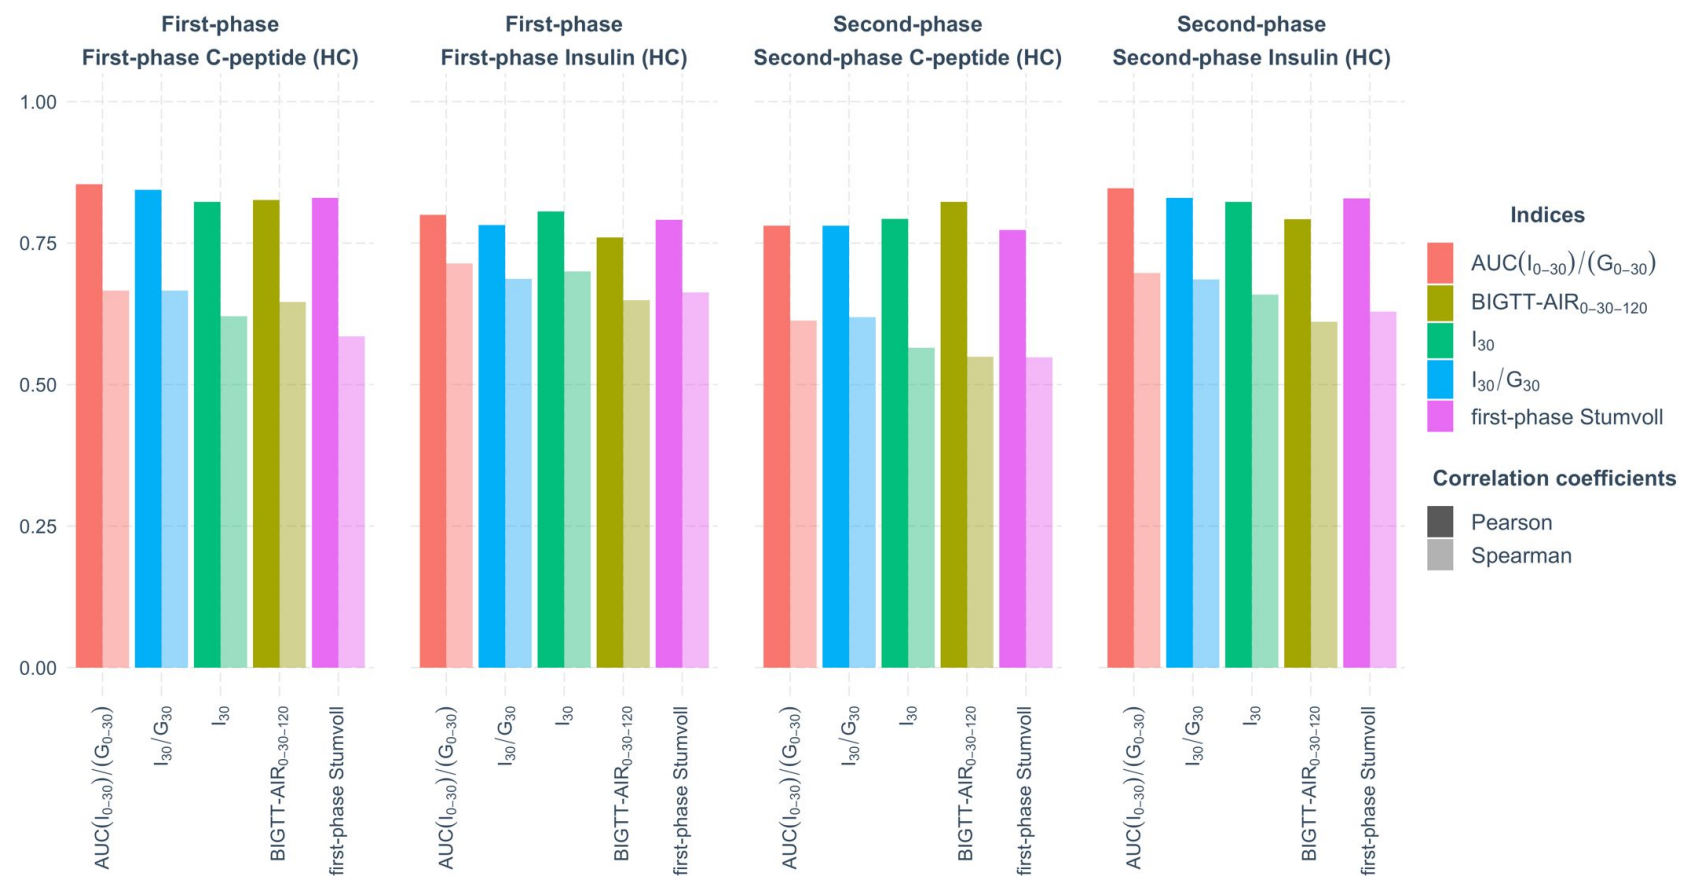

Supplementary Figure 4: Top-indices by Spearman's and Pearson's correlation coefficients in the whole group (n=76) compared to first- and second phase of hyperglycaemic clamp
